# Supplementary material for: Relationship between Joint Roughness Coefficient and Statistical Roughness Parameters and Its Sensitivity to Sampling Interval
Source: MDPI journal article supplement (doi:10.3390/su142013597), 2022-10-20
Supplement: s1 [file s1]

Archive with 1 entries (1 files):
- sustainability-1943397-supplementary.pdf
