# Supplementary material for: Relationship between Joint Roughness Coefficient and Statistical Roughness Parameters and Its Sensitivity to Sampling Interval
Source: MDPI journal article supplement (doi:10.3390/su142013597), 2022-10-20
Supplement: s1 [file s1 › sustainability-1943397-supplementary.pdf]

## Supplementary Material

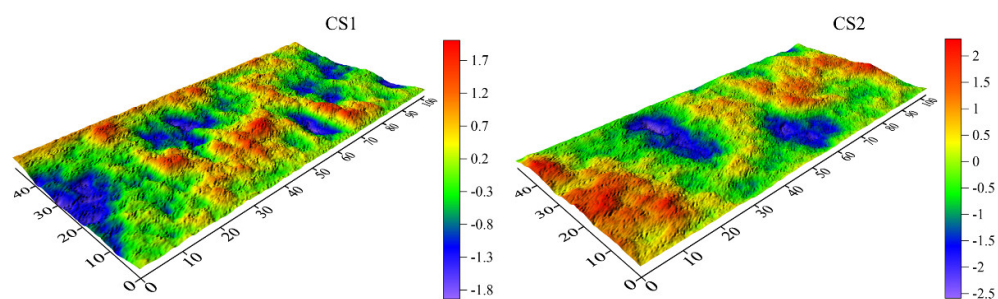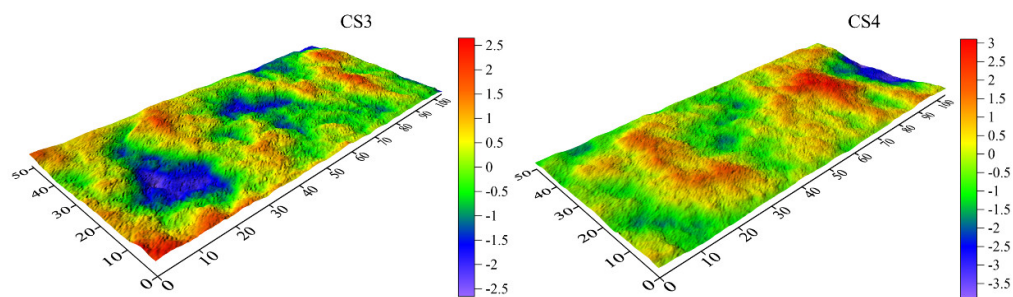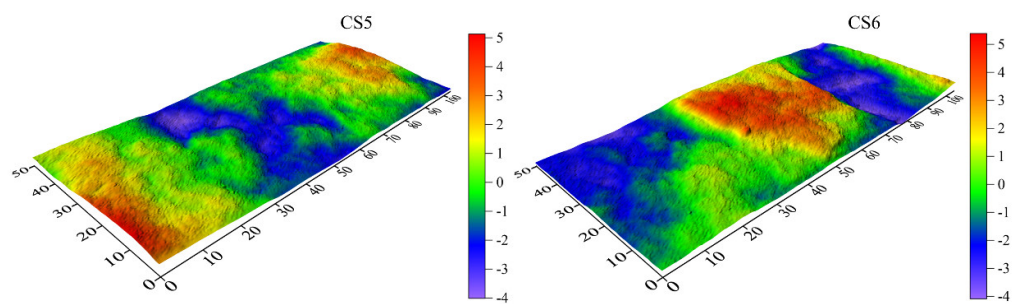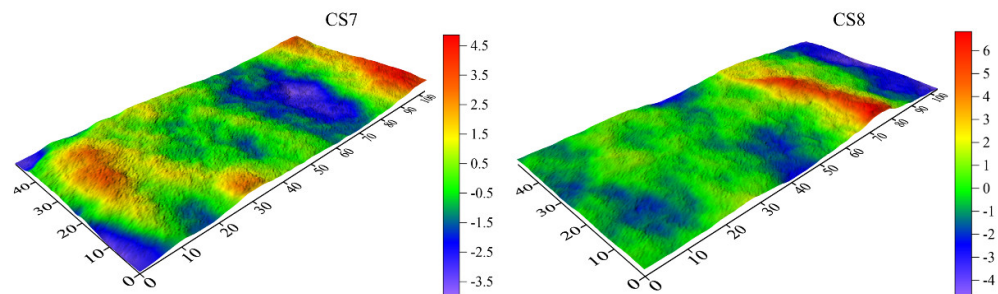

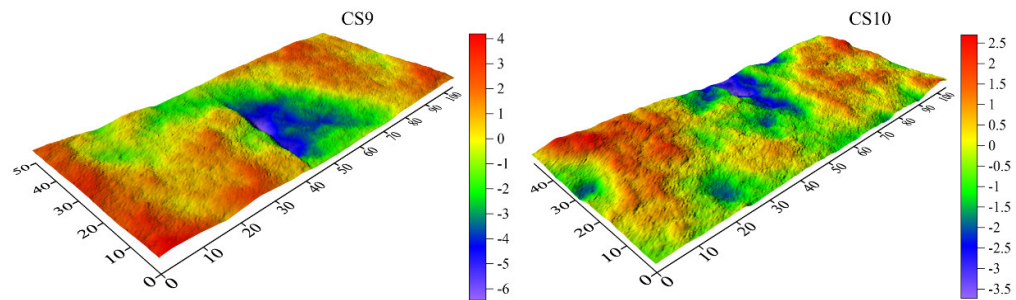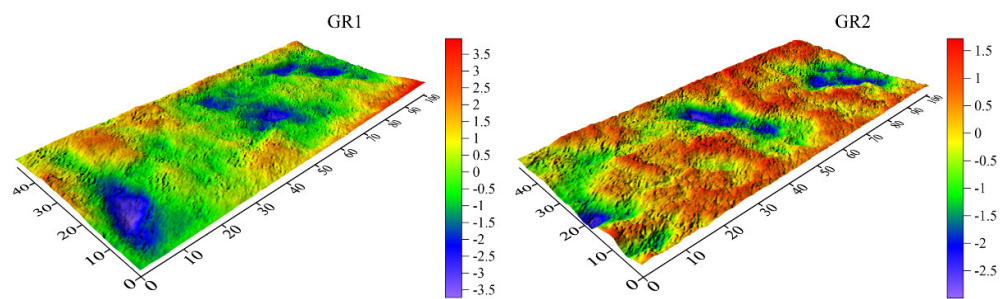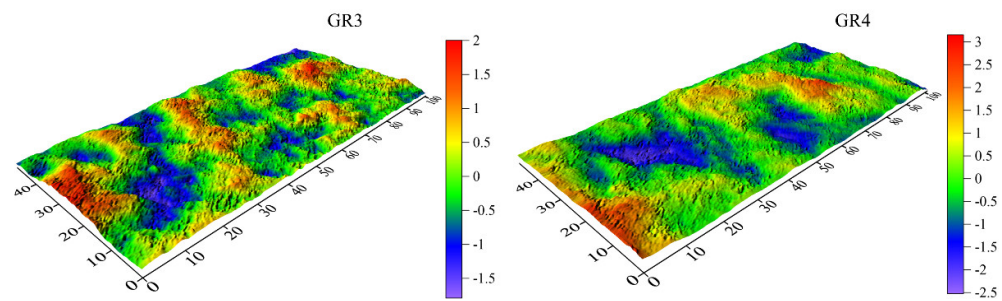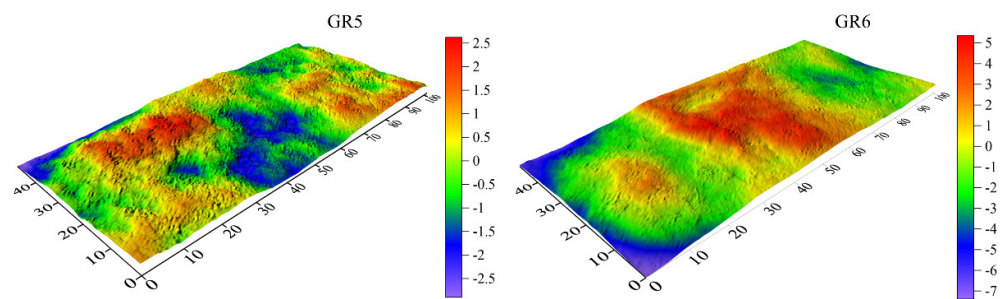

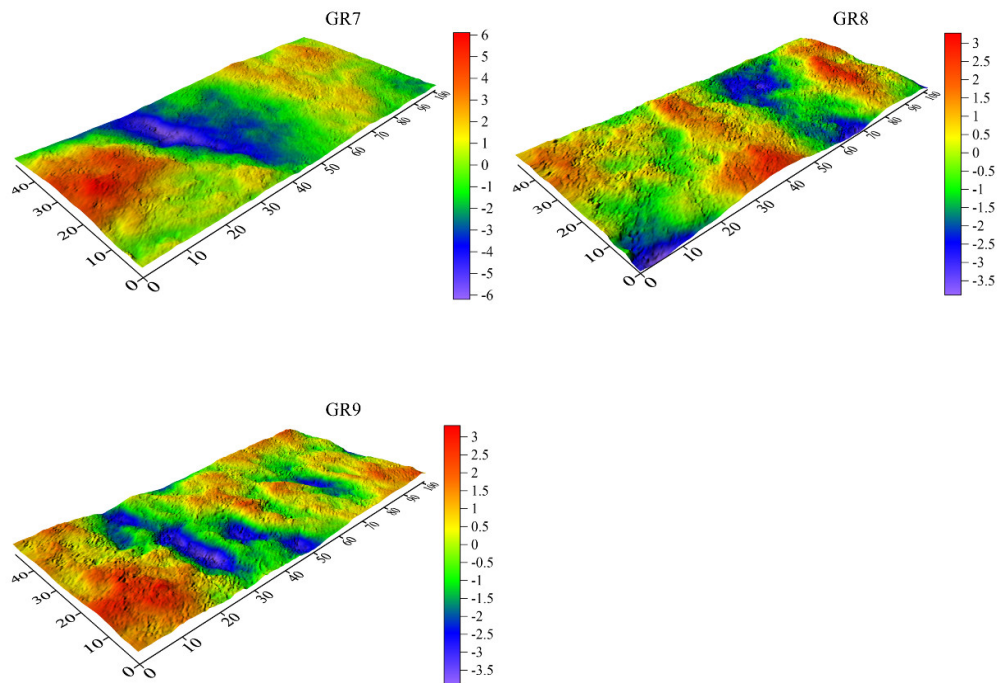

**Figure S1.** Surface morphology of coarse sandstone and granite joint samples (all dimensions are in units of mm).

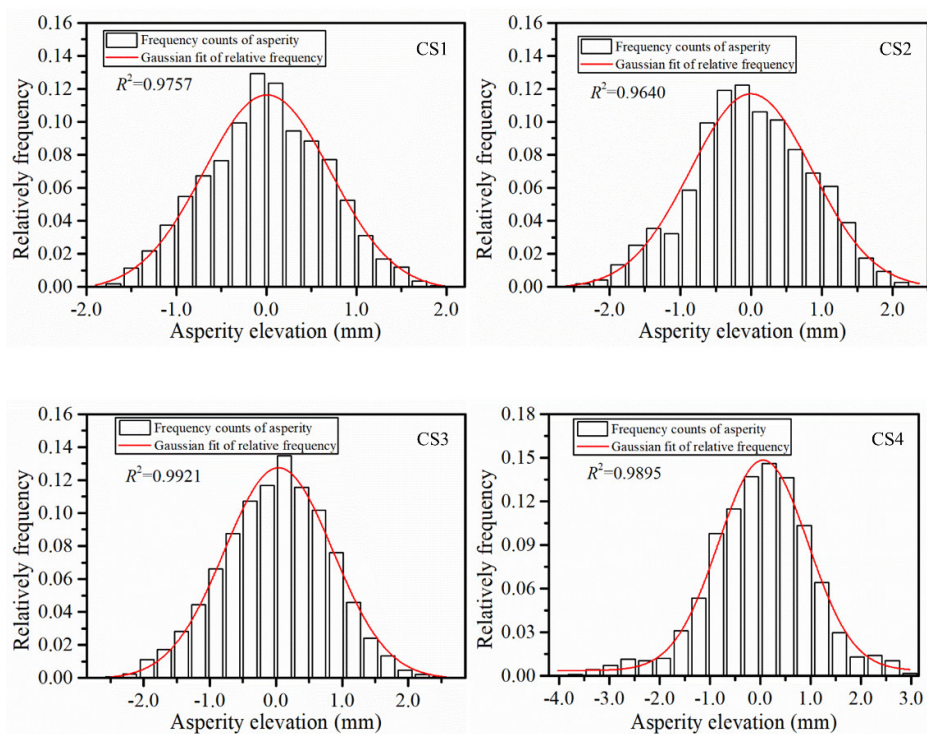

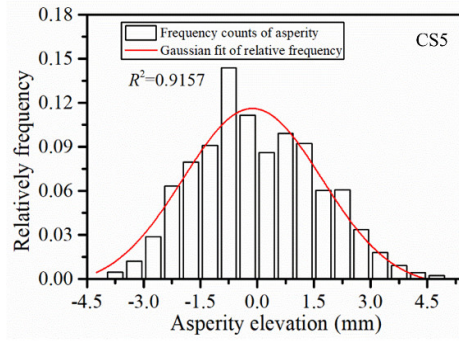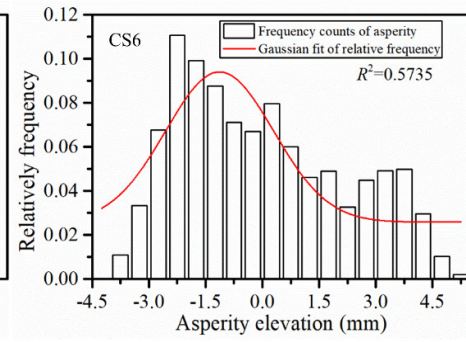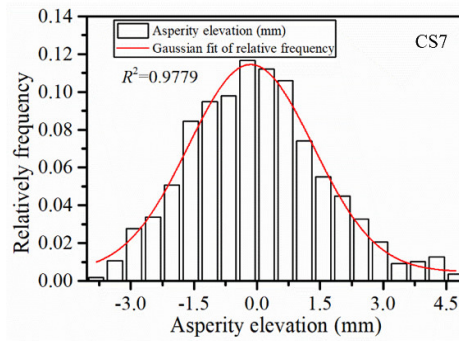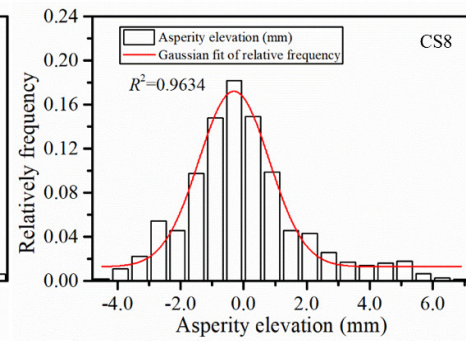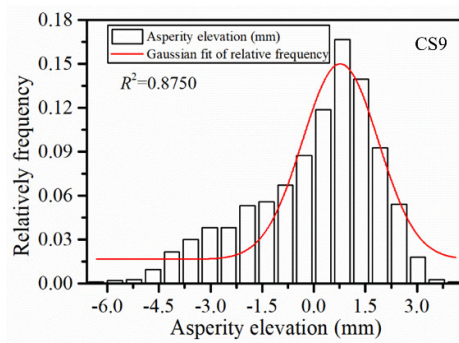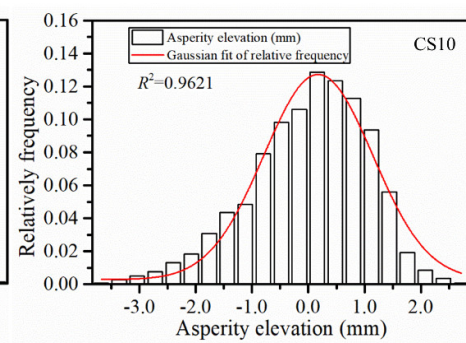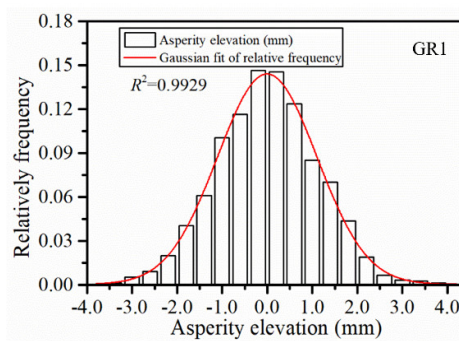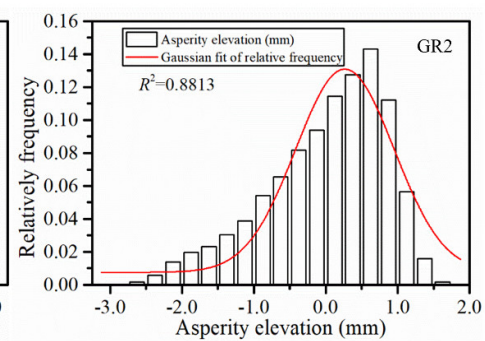

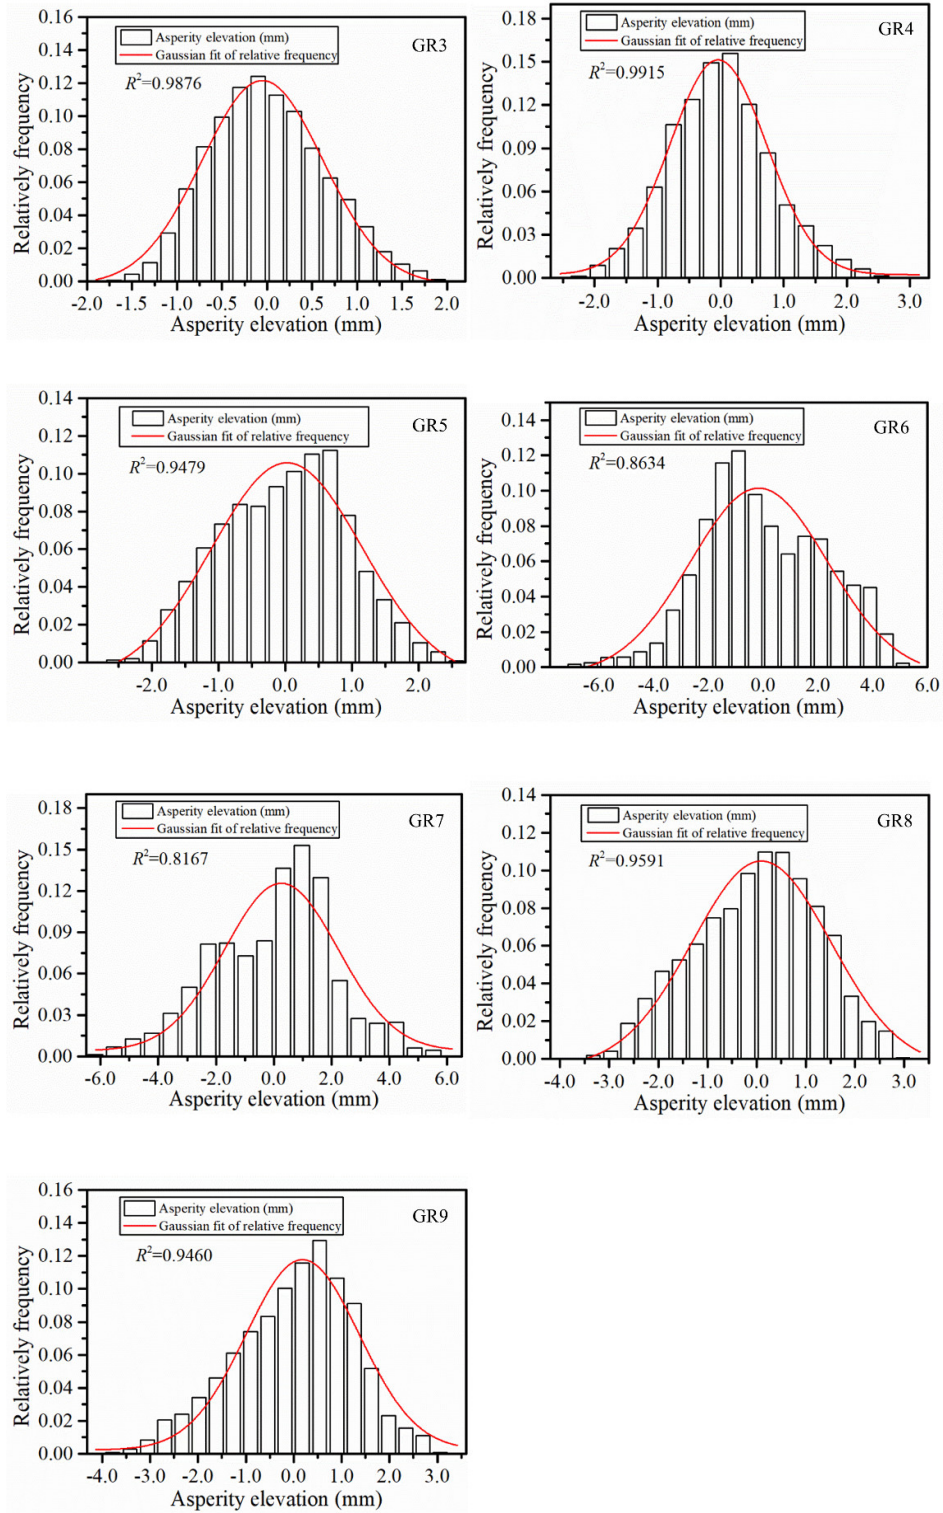

**Figure S2.** Gaussian fit of the asperity elevation distribution for coarse sandstone and granite joint samples.
